# Supplementary material for: Synergetic effects of bimetals in modified beta zeolite for lactic acid synthesis from biomass-derived carbohydrates
Source: Royal Society of Chemistry journal article supplement (doi:10.1039/c7ra12533j), 2018-01-01
Supplement: c7ra12533j1.pdf [file c7ra12533j1.pdf]

## SUPPORTING INFORMATION

### Synergetic effects of bimetal in modified Beta zeolite for lactic acid synthesis from biomass derived carbohydrates

Meng Xia<sup>a</sup>, Wenjie Dong<sup>b</sup>, Minyan Gu<sup>a</sup>, Cheng Chang<sup>a</sup>, Zheng Shen<sup>a,c\*</sup> and Yalei Zhang<sup>a\*</sup>

<sup>a</sup> State Key Laboratory of Pollution Control and Resources Reuse, Key Laboratory of Yangtze River Water Environment of Ministry of Education, College of Environmental Science and Engineering, Tongji University, Shanghai 200092, China; <sup>b</sup> Zhejiang Scientific Research Institute of Transport, Hangzhou 311305; <sup>c</sup> National Engineering Research Center of Protected Agriculture, Tongji University, Shanghai 200092, China

\*E-mail: zhangyalei@tongji.edu.cn; shenzheng@tongji.edu.cn

Figures S1-S7

Tables S1-S4

### Supporting Figures

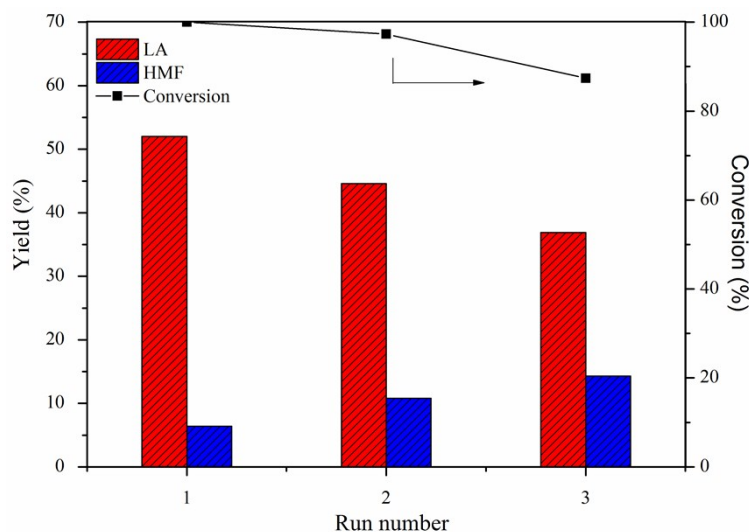

Fig.S1. Reuse of the Pb-Sn-Beta catalysts. Reaction conditions: 190°C, 2 h, Air, 225 mg glucose and 200 mg Pb-Sn-Beta (0.3 mmol·g<sup>-1</sup> metal loading, Pb/ Sn ratio= 4/7). LA: lactic acid

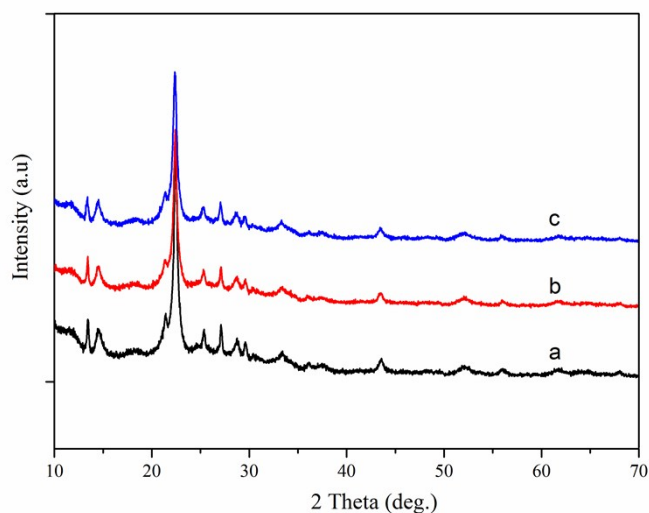

Fig.S2. X-ray diffraction patterns of reused catalysts. a. fresh catalyst; b. catalyst after first calcination; c. catalyst after second calcination

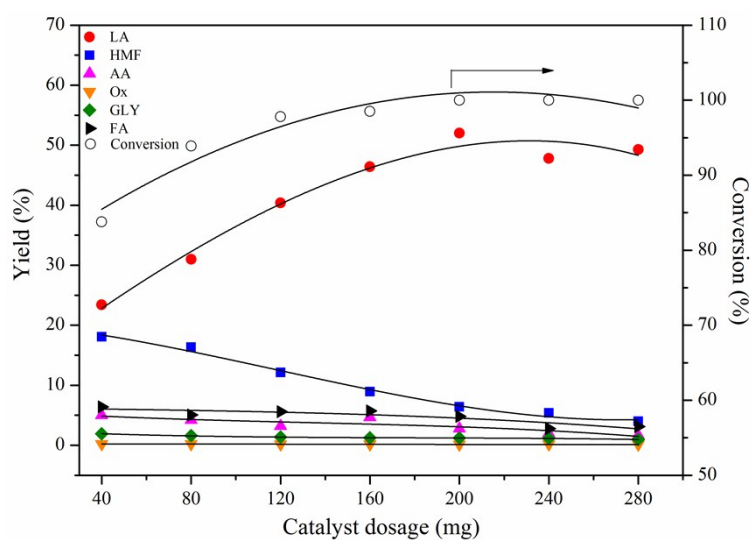

Fig.S3. Effect of catalyst dosage on the yields of main products with Pb-Sn-Beta. Reaction conditions: 190°C, 2 h, Air, 225 mg glucose, Pb-Sn-Beta (0.3 mmol·g<sup>-1</sup> metal loading, Pb/ Sn ratio= 4/7). LA: lactic acid, AA: acetic acid, FA: formic acid, GLY: glycolic acid, Ox: oxalic acid.

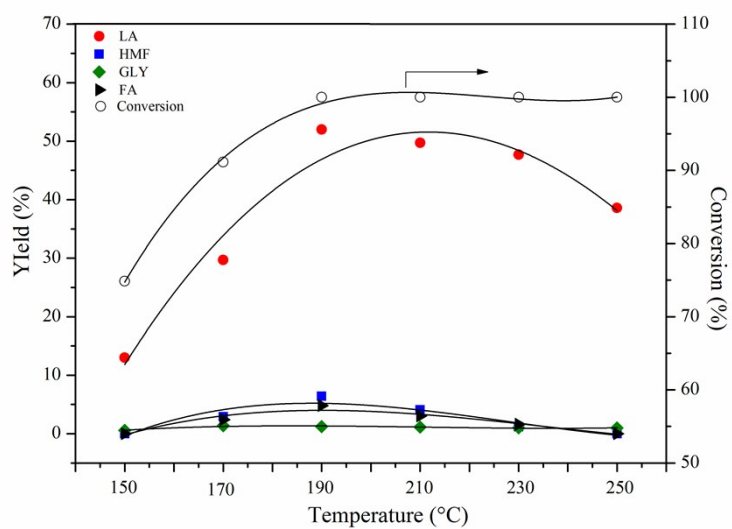

Fig.S4. Effect of temperature on the yields of main products with Pb-Sn-Beta. Reaction conditions: 2 h, Air, 225 mg glucose and 200 mg Pb-Sn-Beta ( $0.3 \text{ mmol} \cdot \text{g}^{-1}$  metal loading, Pb/Sn ratio= 4/7). LA: lactic acid, AA: acetic acid, FA: formic acid, GLY: glycolic acid.

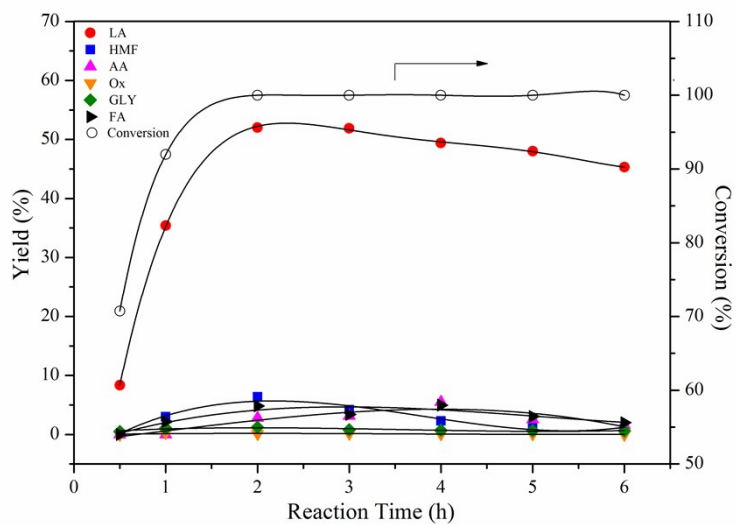

Fig.S5. Effect of reaction time on the yields of main products with Pb-Sn-Beta. Reaction conditions:  $190^{\circ}\text{C}$ , Air, 225 mg glucose and 200 mg Pb-Sn-Beta ( $0.3 \text{ mmol} \cdot \text{g}^{-1}$  metal loading, Pb/Sn ratio= 4/7). LA: lactic acid, AA: acetic acid, FA: formic acid, GLY: glycolic acid, Ox: oxalic acid.

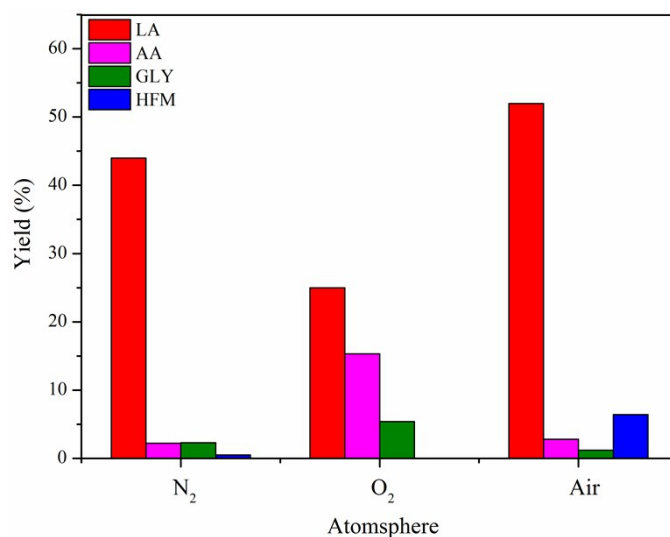

Fig.S6. Effect of atmosphere on the yields of main products with Pb-Sn-Beta. Reaction conditions: 190°C, 2 h, 225 mg glucose and 200 mg Pb-Sn-Beta (0.3 mmol·g<sup>-1</sup> metal loading, Pb/ Sn ratio= 4/7). LA: lactic acid, AA: acetic acid, GLY: glycolic acid

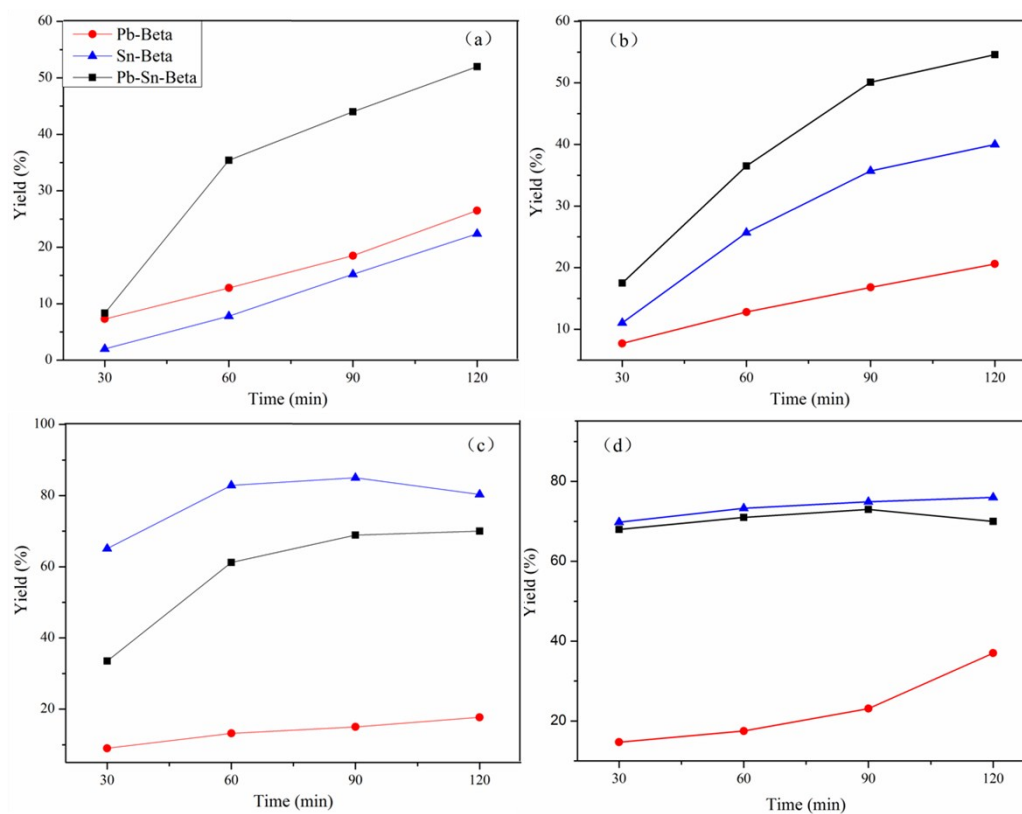

Fig.S7. Catalytic conversion of glucose and intermediates: (a) glucose; (b) fructose; (c) dihydroxyacetone; (d) pyruvaldehyde to lactic acid over Pb-Beta, Sn-Beta, and Pb-Sn-Beta zeolite respectively. Reaction conditions: 190°C, 2 h, Air, 10 ml water, 225 mg carbohydrate (7.5 mmol) and 200 mg catalyst (Pb-Sn-Beta: 0.3 mmol·g<sup>-1</sup> metal loading, Pb/ Sn ratio= 4/7; Sn-Beta and Pb-Beta: 0.3 mmol·g<sup>-1</sup> metal loading )

## Supporting Tables

**Table S1. Catalytic performance of different bimetal modified Beta zeolites**

| Entry | Catalyst <sup>a</sup> | Conversion (%) | The yields of aqueous-phase main products (%) |      |     |     |     |
|-------|-----------------------|----------------|-----------------------------------------------|------|-----|-----|-----|
|       |                       |                | Lactic acid                                   | HMF  | GLY | FA  | AA  |
| 1     | Ni-Sn-Beta            | >99            | 38.7                                          | 9.7  | —   | 1.7 | 3.6 |
| 3     | Cu-Sn-Beta            | >99            | 28.0                                          | 14.7 | 7.0 | 2.8 | 2.3 |
| 4     | Ce-Sn-Beta            | >99            | 33.9                                          | 10.4 | —   | 4.4 | 5.0 |
| 5     | Pb-Sn-Beta            | >99            | 45.1                                          | 5.3  | 1.6 | 5.0 | 6.2 |

<sup>a</sup> Metal loading is 0.3 mmol·g<sup>-1</sup> and bimetallic ratio is 1:1. Reaction conditions: sugars (7.5 mmol C), 10 ml water, 200 mg catalyst, 190°C, 2 h, Air

**Table S2. The contents of Lewis and Brønsted acid sites of different catalysts**

| Entry | Catalyst                   | B <sub>150</sub> <sup>a</sup> | L <sub>150</sub> <sup>a</sup> |
|-------|----------------------------|-------------------------------|-------------------------------|
|       |                            | mmol·g <sup>-1</sup>          |                               |
| 1     | Beta                       | 0.127                         | 0.100                         |
| 2     | deAl-Beta                  | 0.003                         | 0.015                         |
| 3     | Pb-Sn-Beta-1               | 0.005                         | 0.015                         |
| 4     | Pb-Sn-Beta-2               | 0.004                         | 0.033                         |
| 5     | Pb-Sn-Beta-3               | 0.005                         | 0.056                         |
| 6     | Pb-Sn-Beta-4               | 0.000                         | 0.076                         |
| 7     | Pb-Sn-Beta-5               | 0.003                         | 0.045                         |
| 8     | Sn-Beta                    | 0.004                         | 0.040                         |
| 9     | Pb-Beta                    | 0.004                         | 0.016                         |
| 10    | Pb-Sn-Beta <sup>1thb</sup> | 0.003                         | 0.020                         |
| 11    | Pb-Sn-Beta <sup>2thc</sup> | 0.003                         | 0.016                         |

<sup>a</sup> Acidic properties of samples were determined by FT-IR spectra of adsorbed pyridine. <sup>b</sup> Catalyst after first calcination <sup>c</sup> Catalyst after second calcination

**Table S3. The yield of lactic acid obtained from various carbohydrates over Pb-Sn-Beta zeolite**

| Entry | Substrate | Conversion (%) | Lactic acid yield (%) |
|-------|-----------|----------------|-----------------------|
| 1     | Glucose   | >99            | 52.0                  |
| 3     | Fructose  | >99            | 54.6                  |
| 4     | Mannose   | >99            | 53.8                  |

|          |           |     |      |
|----------|-----------|-----|------|
| <b>5</b> | Sucrose   | >99 | 51.2 |
| <b>6</b> | Lactose   | >99 | 37.8 |
| <b>7</b> | Cellulose | ~30 | 10.1 |
| <b>8</b> | Starch    | ~35 | 16.2 |

Reaction conditions: carbohydrate (7.5 mmol C), 10 ml water, 200 mg Pb-Sn-Beta (0.3 mmol·g<sup>-1</sup> metal loading, Pb/ Sn ratio= 4/7), 190°C, 2 h, Air

**Table S4. The ICP-OES analysis results of different Pb/Sn ratios**

| <b>Pb/Sn ratio<sup>a</sup></b> | <b>Pb (mmol·g<sup>-1</sup>)</b> | <b>Sn (mmol·g<sup>-1</sup>)</b> |
|--------------------------------|---------------------------------|---------------------------------|
| <b>0/10</b>                    | —                               | 0.30                            |
| <b>3/7</b>                     | 0.09                            | 0.21                            |
| <b>4/6</b>                     | 0.11                            | 0.18                            |
| <b>5/5</b>                     | 0.13                            | 0.15                            |
| <b>6/4</b>                     | 0.17                            | 0.13                            |
| <b>7/3</b>                     | 0.19                            | 0.09                            |
| <b>10/0</b>                    | 0.28                            | —                               |

<sup>a</sup> The metal content of different Pb/Sn ratio catalysts is 0.3mmol·g<sup>-1</sup> in Beta zeolites.
